# Supplementary material
Source: publisher site journal article supplement (https://www.spandidos-publications.com/2078/downloadSupplementary)

Figure S1. Effects of the Smad decoy the viability of HSF. HSF was treated with different concentrations of PepC with or without the Smad decoy for 72 h. Viability was measured using an MTT assay. Data are expressed as the average percentage of the control and are pooled from 3 replicate experiments. Error bars indicate the mean  $\pm$  standard error of the mean (n=3). \*P<0.05 vs. control. Statistical analysis was performed using one-way analysis of variance and Tukey's post hoc test. HSF, human skin fibroblasts; PepC, cell-penetrating peptide.

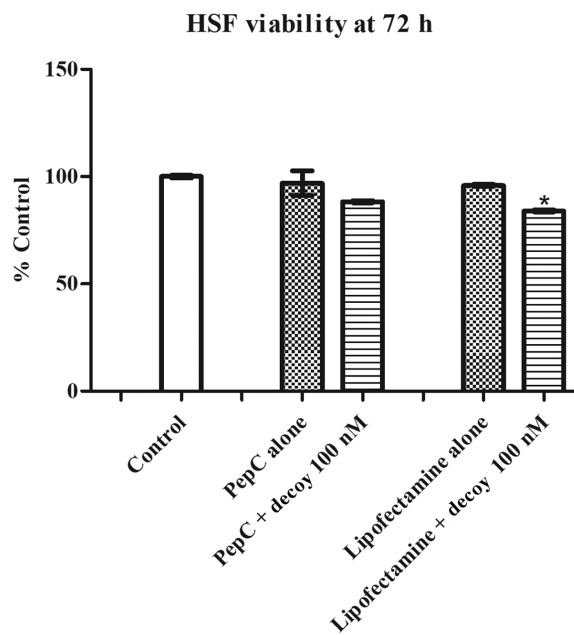

Supplement: Supplementary file 1 [file downloadSupplementary]
